# Supplementary material for: Laser processing of Li-doped mesoporous TiO2 for ambient-processed mesoscopic perovskite solar cells
Source: Royal Society of Chemistry journal article supplement (doi:10.1039/d3tc03151a), 2024-01-01
Supplement: d3tc03151a1.pdf [file d3tc03151a1.pdf]

## Supporting Information

### Laser Processing of Li-doped Mesoporous TiO<sub>2</sub> for Ambient-processed Mesoscopic Perovskite Solar Cells

Hongbo Mo,<sup>ab1</sup> Qian Chen,<sup>a1\*</sup> Dong Wang,<sup>a</sup> Wei Guo,<sup>b</sup> Dongxu Cheng,<sup>b</sup> Yang Sha,<sup>a</sup> Muhamad Z. Mokhtar,<sup>a</sup> Zhenyu Jia,<sup>a</sup> Janet Jacobs,<sup>b</sup> Andrew G Thomas,<sup>acd</sup> Lin Li,<sup>b</sup> Zhu Liu,<sup>ae\*</sup> and Richard J Curry<sup>cd\*</sup>

<sup>a</sup> Department of Materials, The University of Manchester, Oxford Road, Manchester, M13 9PL, UK

<sup>b</sup> Laser Processing Research Center, Department of Mechanical, Aerospace and Civil Engineering, The University of Manchester, Oxford Road, Manchester, M13 9PL, UK

<sup>c</sup> Photon Science Institute, Department of Electrical and Electronic Engineering, The University of Manchester, Oxford Road, Manchester, M13 9PL, UK

<sup>d</sup> Henry Royce Institute, The University of Manchester, Oxford Road, Manchester M13 9PL, UK

<sup>e</sup> Research Centre for Laser Extreme Manufacturing, Ningbo Institute of Materials Engineering and Technology, Chinese Academy of Science, Ningbo, China.

\* Corresponding authors: [qian.chen-2@manchester.ac.uk](mailto:qian.chen-2@manchester.ac.uk); [liuzhu@nimte.ac.cn](mailto:liuzhu@nimte.ac.cn); [richard.curry@manchester.ac.uk](mailto:richard.curry@manchester.ac.uk)

<sup>1</sup> These authors have contributed equally to this work.

### Keywords

*Laser treatment, mesoporous TiO<sub>2</sub>, doped-TiO<sub>2</sub>, Ambient-processed, Perovskite solar cells*

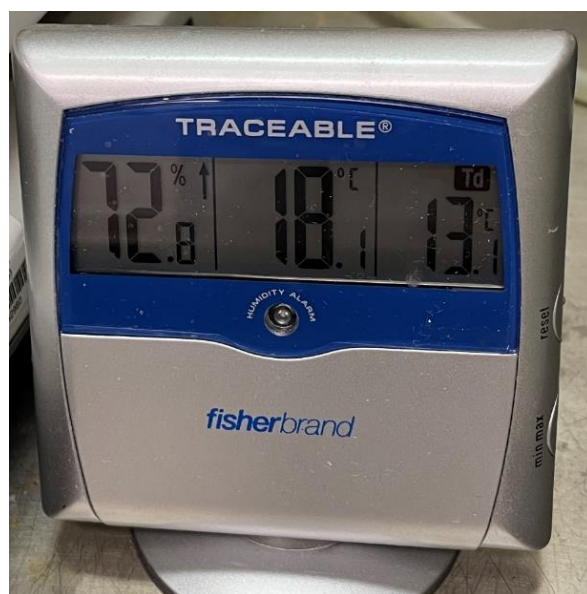

Figure S1 Humidity meter showing relative humidity 72.8% during the fabrication of the PSCs.

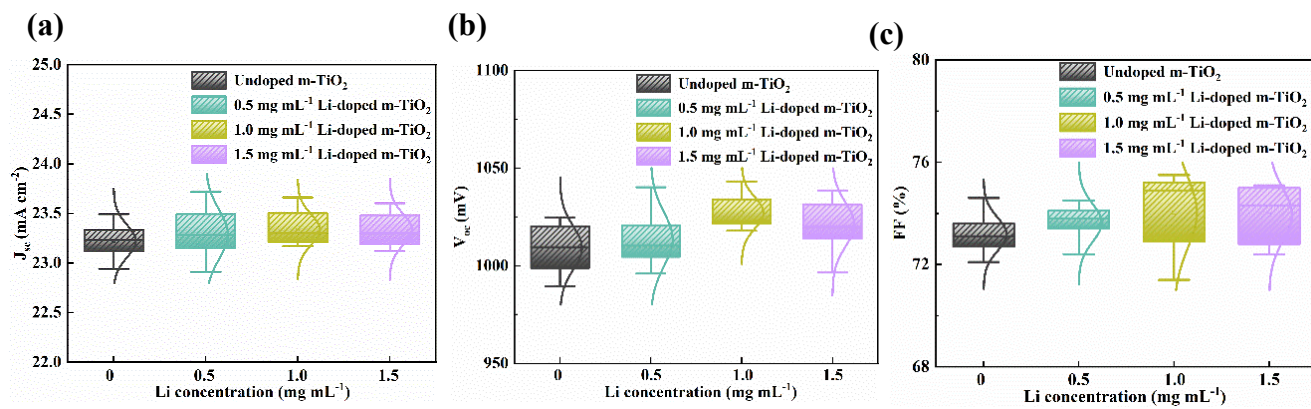

Figure S2 (a)  $J_{sc}$  and (b)  $V_{oc}$  (c) FF distribution for the PSCs based on the m-TiO<sub>2</sub> with various Li doping concentration.

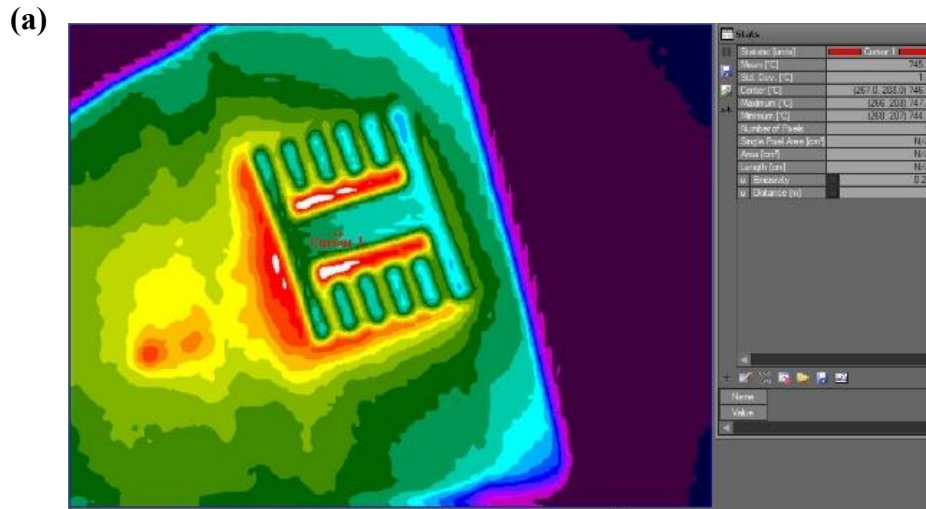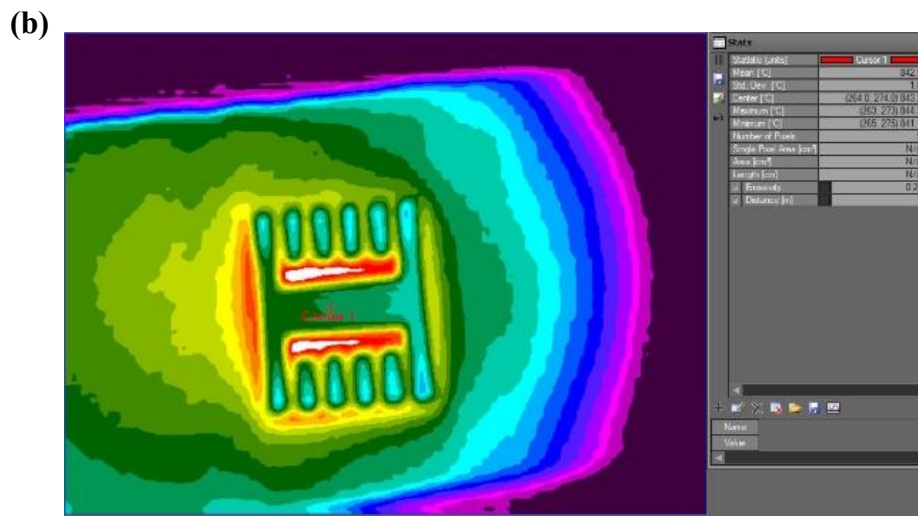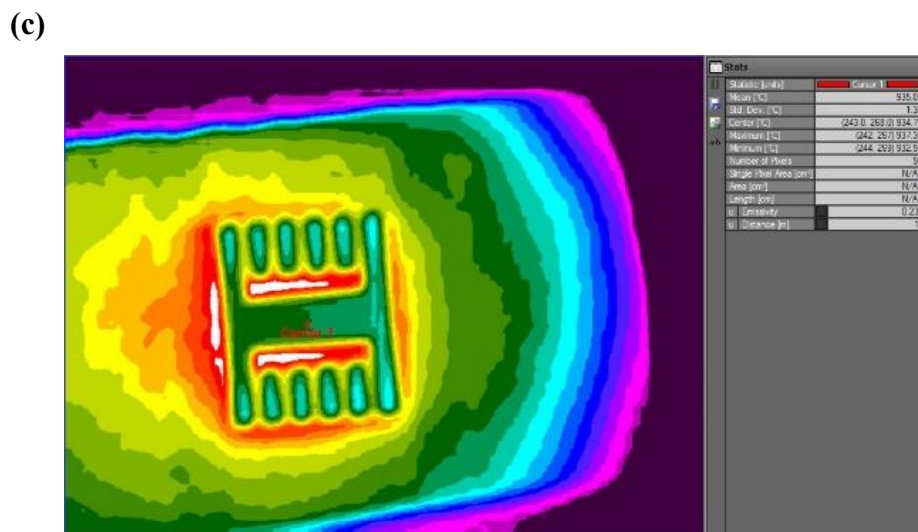

Figure S3 Thermal profiles of the laser-treated Li-doped m-TiO<sub>2</sub> on the ITO-glass with highest treatment temperatures of (a) 700-750, (b) 800-850, and (c) 900-950 °C.

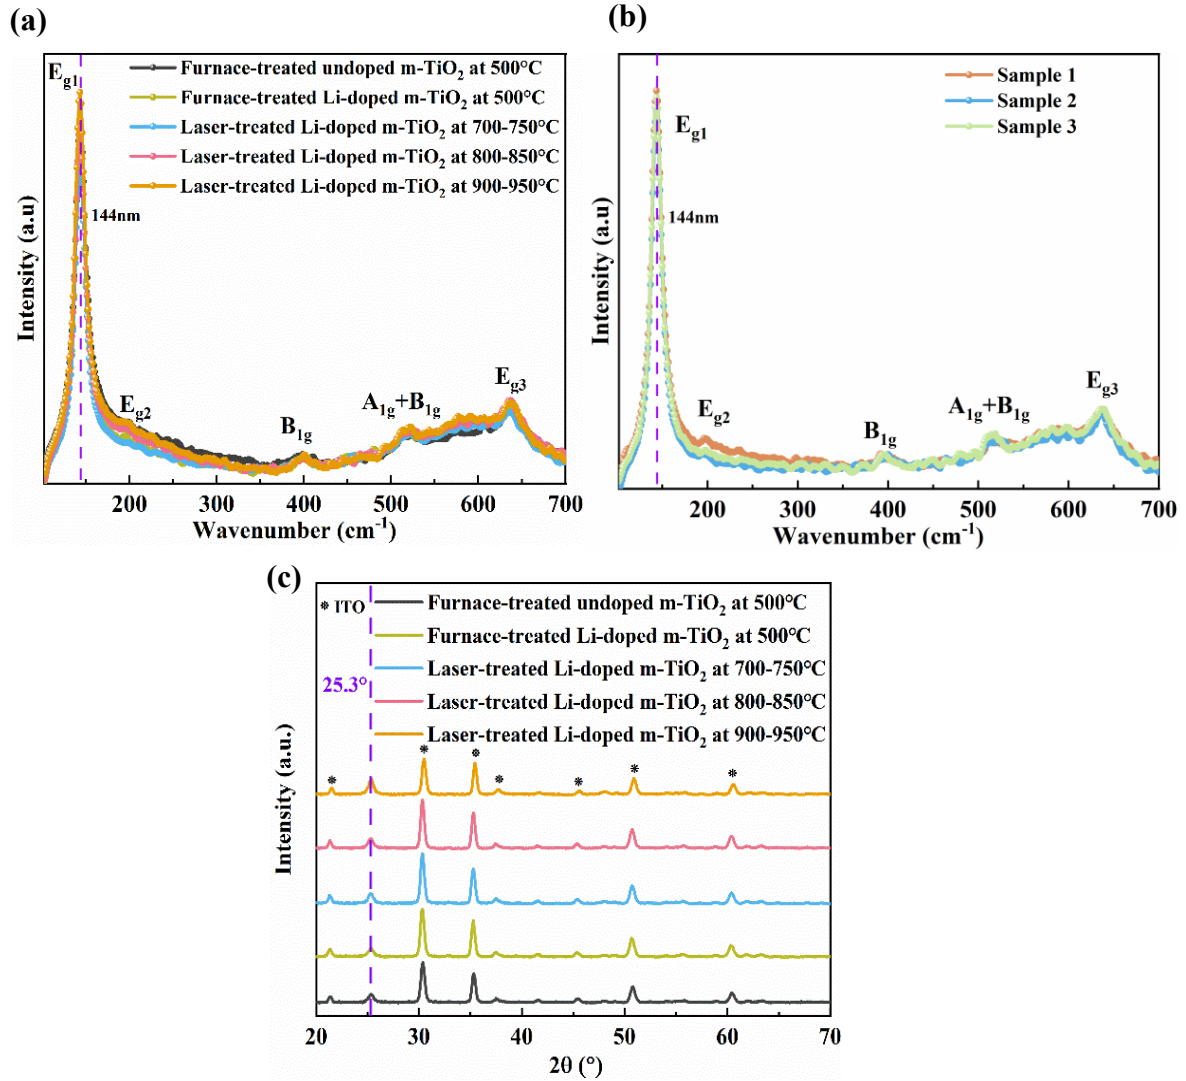

Figure S4 (a) Raman spectra of the furnace-treated undoped m-TiO<sub>2</sub>, furnace- and laser-treated Li-doped m-TiO<sub>2</sub> films, (b) Raman Spectra for 3 different samples with condition of laser-treated Li-doped m-TiO<sub>2</sub> films at 850°C. and (c) XRD patterns of the furnace-treated undoped m-TiO<sub>2</sub>, furnace- and laser-treated Li-doped m-TiO<sub>2</sub> films.

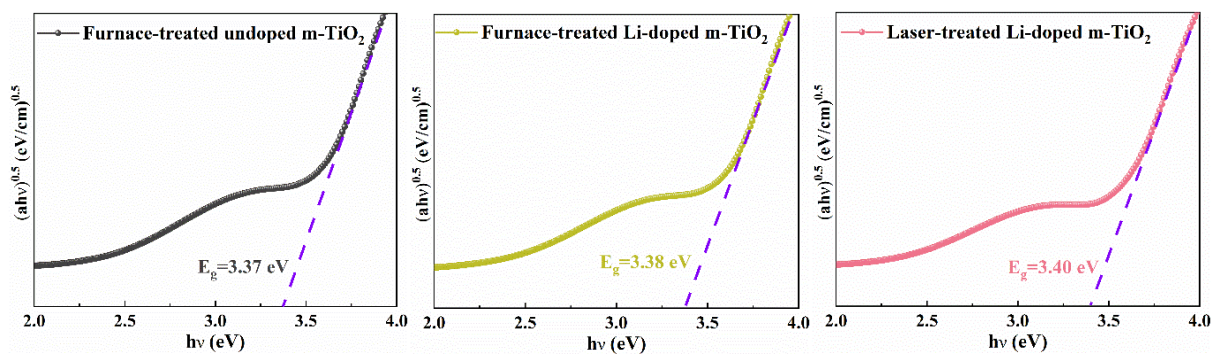

Figure S5 Tauc plots for (a) furnace-treated undoped  $m\text{-TiO}_2$ , (b) furnace-treated Li-doped  $m\text{-TiO}_2$  and (c) laser-treated Li-doped  $m\text{-TiO}_2$  (800-850 °C).

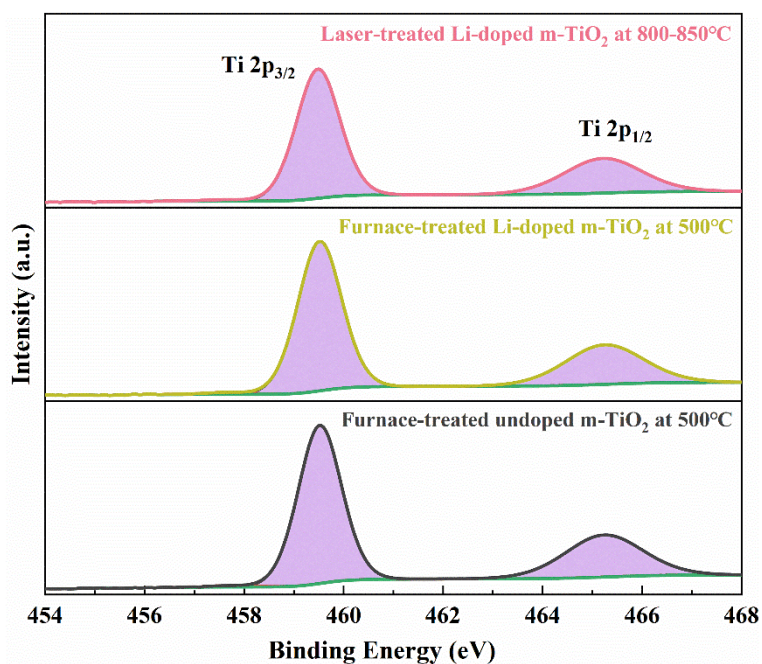

Figure S6 XPS high resolution profile of Ti 2p for the furnace-treated undoped  $m\text{-TiO}_2$ , Li-doped  $m\text{-TiO}_2$  and laser-treated Li-doped  $m\text{-TiO}_2$  films (800-850 °C).

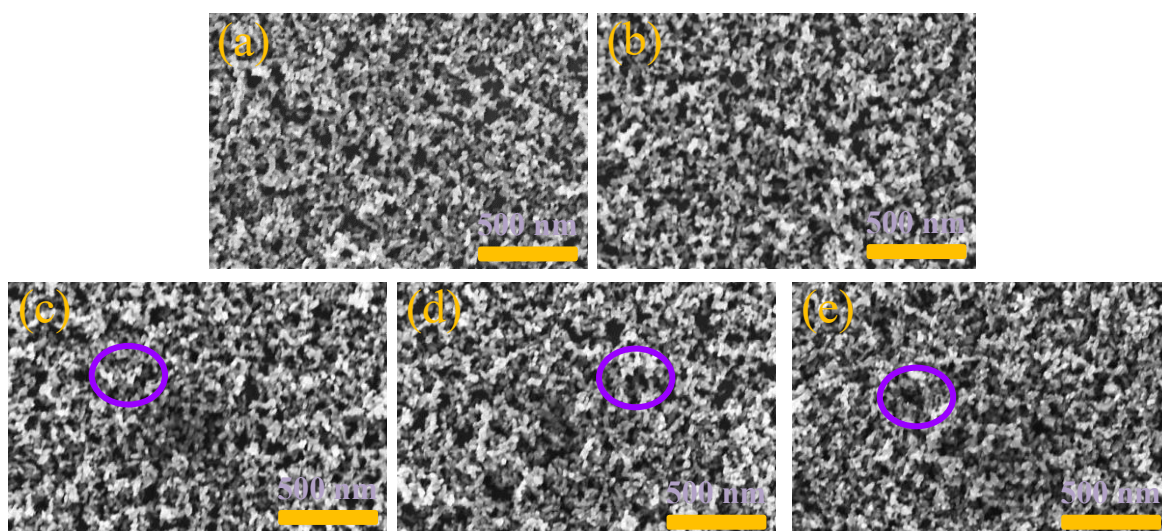

Figure S7 Top view SEM images for (a) furnace-treated undoped m-TiO<sub>2</sub> film, (b) furnace-treated Li-doped m-TiO<sub>2</sub> film and laser-treated Li-doped m-TiO<sub>2</sub> films with the highest annealing temperature of (c) 700–750 °C, (d) 800–850 °C, (e) 900–950 °C (interconnected TiO<sub>2</sub> particles marked in purple circle, scale bar = 500 nm).

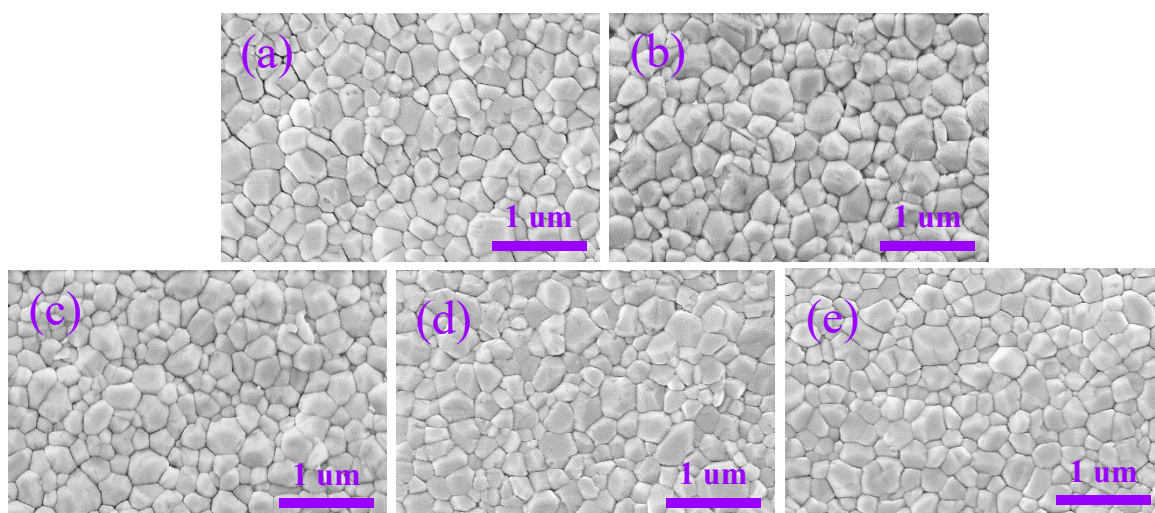

Figure S8 Top view SEM images for the perovskite film deposited on (a) furnace-treated undoped m-TiO<sub>2</sub> film, (b) furnace-treated Li-doped m-TiO<sub>2</sub> film and laser-treated Li-doped m-TiO<sub>2</sub> film with the highest processing temperature of (c) 700–750 °C, (d) 800–850 °C, (e) 900–950 °C (scale bar = 1 μm).

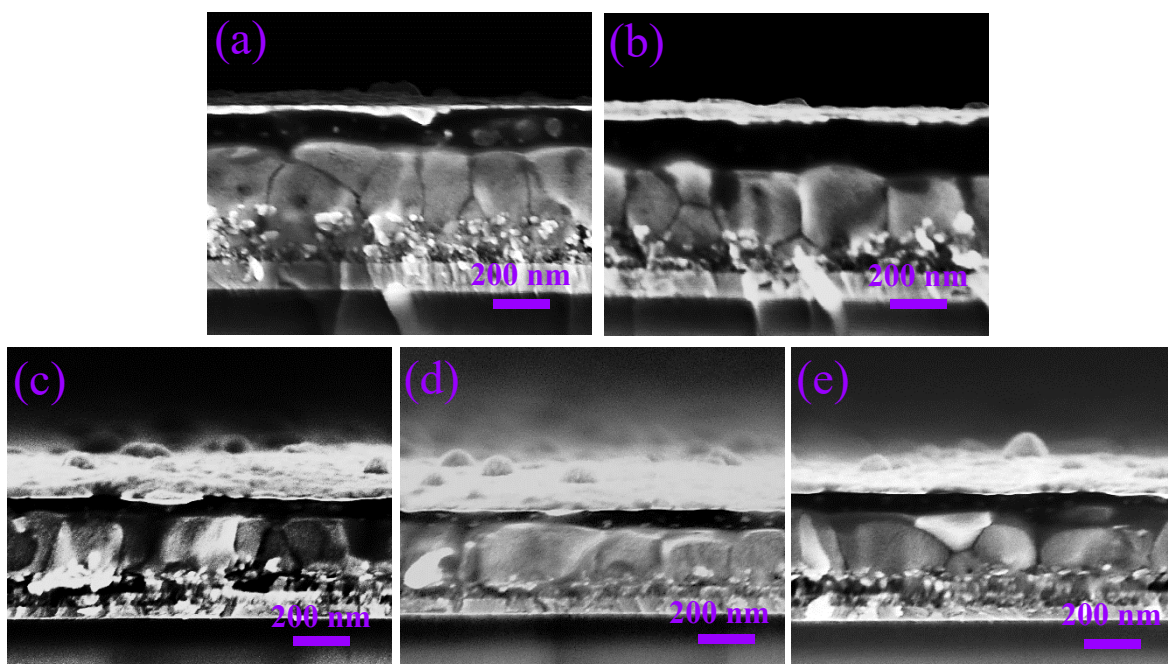

Figure S9 Cross-sectional SEM view for the PSCs based on the (a) furnace-treated undoped m-TiO<sub>2</sub> film, (b) furnace-treated Li-doped m-TiO<sub>2</sub> film and laser-treated Li-doped m-TiO<sub>2</sub> films with the highest processing temperature of (c) 700–750 °C, (d) 800–850 °C, (e) 900–950 °C.

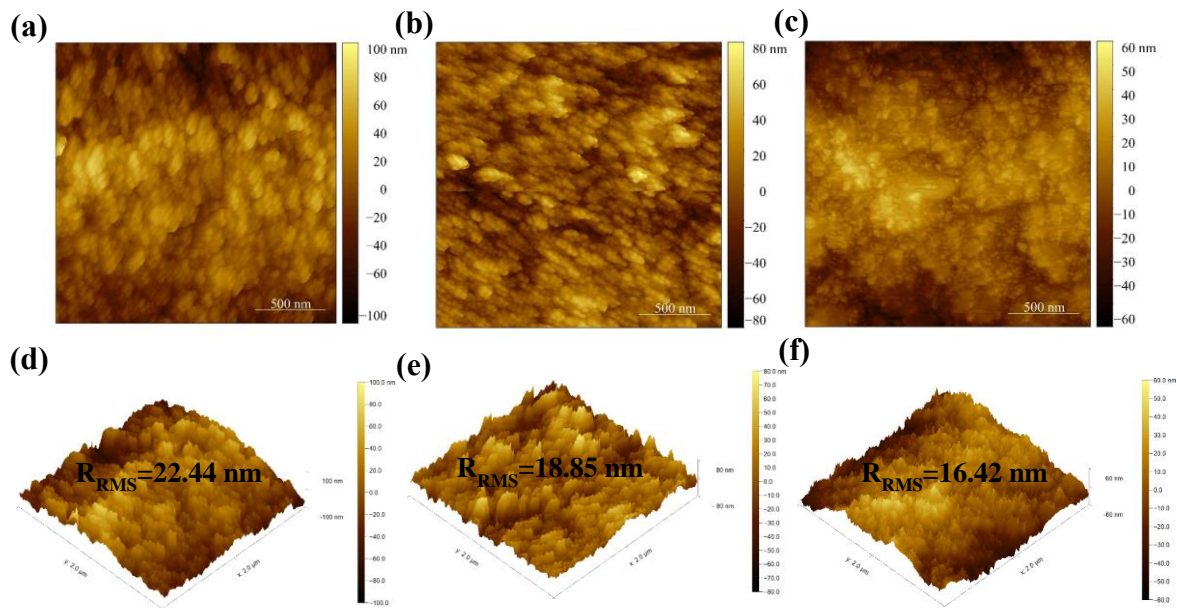

Figure S10 AFM topography for (a,d) furnace-treated undoped m-TiO<sub>2</sub>, (b,e) furnace-treated Li-doped m-TiO<sub>2</sub> and (c,f) laser-treated Li-doped m-TiO<sub>2</sub> (800-850 °C).

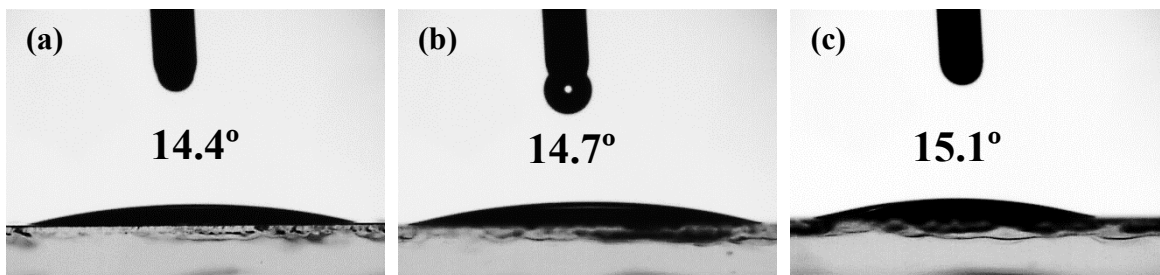

Figure S11 Water contact measurements for (a) furnace-treated undoped m-TiO<sub>2</sub>, (b) furnace-treated Li-doped m-TiO<sub>2</sub> and (c) laser-treated Li-doped m-TiO<sub>2</sub> (800-850 °C).



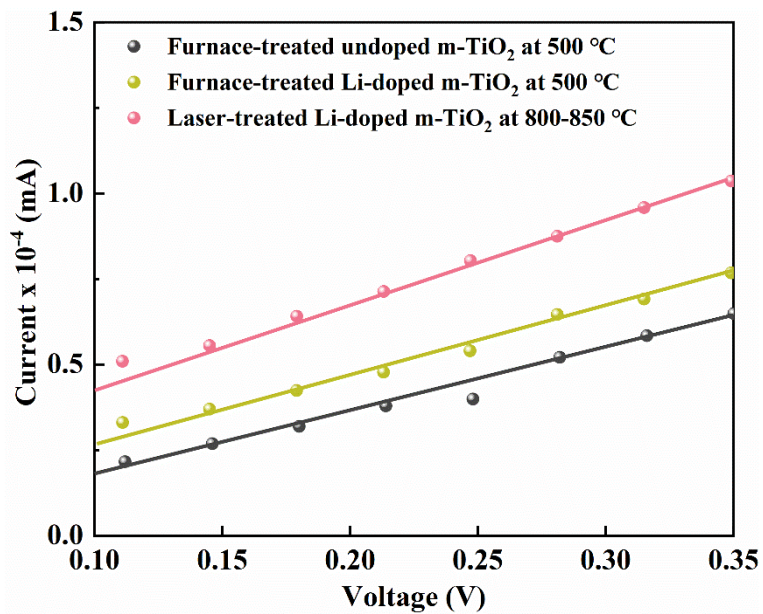

Figure S12  $I$ - $V$  curves ohmic region of the furnace-treated undoped m-TiO<sub>2</sub>, Li-doped m-TiO<sub>2</sub> and laser-treated Li-doped m-TiO<sub>2</sub> films (800-850 °C).

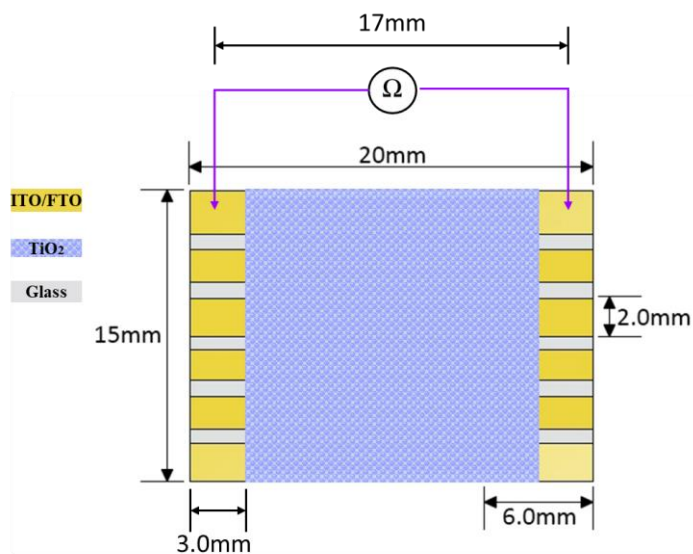

Figure S13 Schematic representation of the ITO/FTO resistance measurement by two-probe method with a measure distance of 17 mm between the two electrodes.

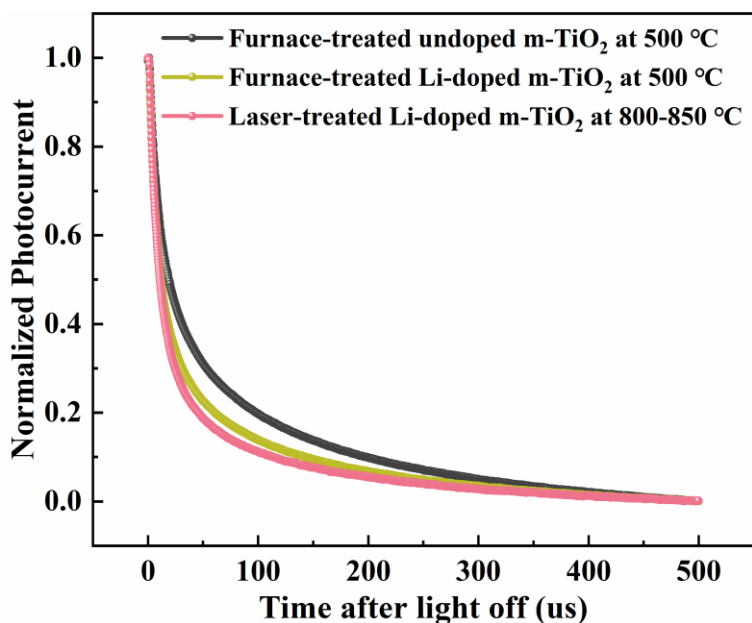

Figure S14 Transient photo-current decay of PSCs based on furnace-treated undoped m-TiO<sub>2</sub>, Li-doped m-TiO<sub>2</sub> and laser-treated Li-doped m-TiO<sub>2</sub> films (800-850 °C).

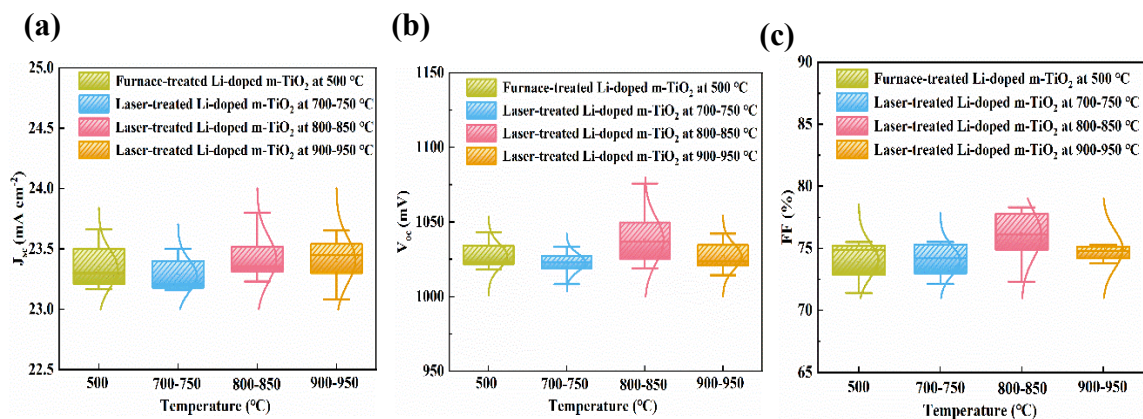

Figure S15 (a)  $J_{SC}$  and (b)  $V_{OC}$  (c) FF distribution for PSCs based on furnace-treated Li-doped m-TiO<sub>2</sub> and laser-treated Li-doped m-TiO<sub>2</sub> films.

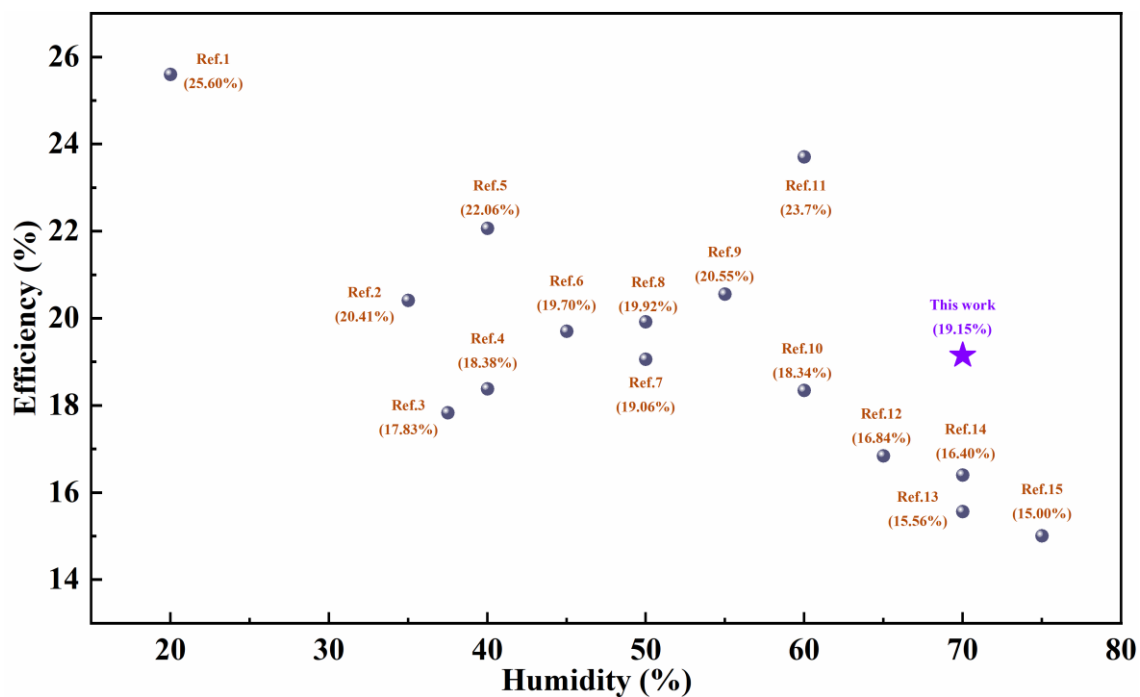

Figure S16 The summary of the state-of-the-art efficiencies for ambient processed PSCs under various humidity [1–15].

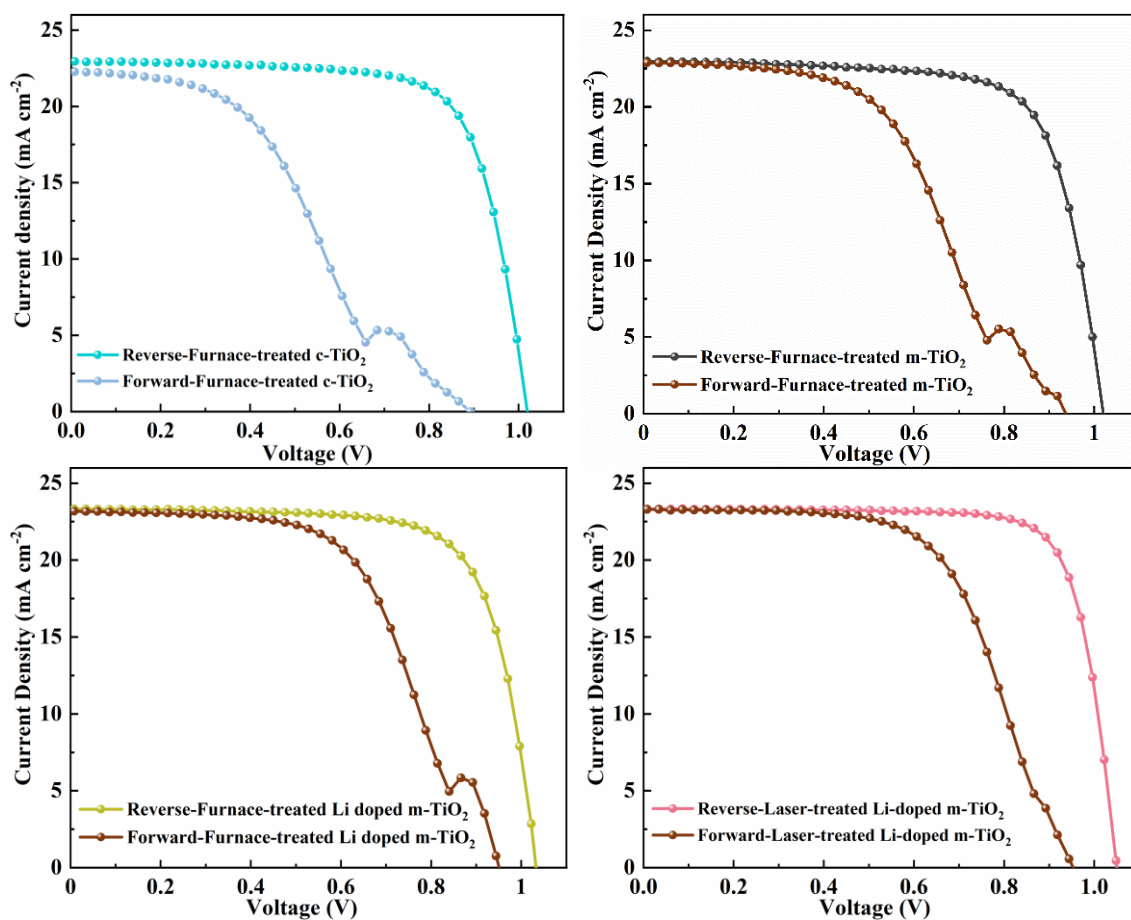

Figure S17 The  $J$ - $V$  curves of PSCs measured in reverse and forward scan for (a) furnace-treated pure c-TiO<sub>2</sub>, (b) furnace-treated pure m-TiO<sub>2</sub>, (c) furnace-treated Li doped m-TiO<sub>2</sub>, and (d) laser-treated Li-doped m-TiO<sub>2</sub>.

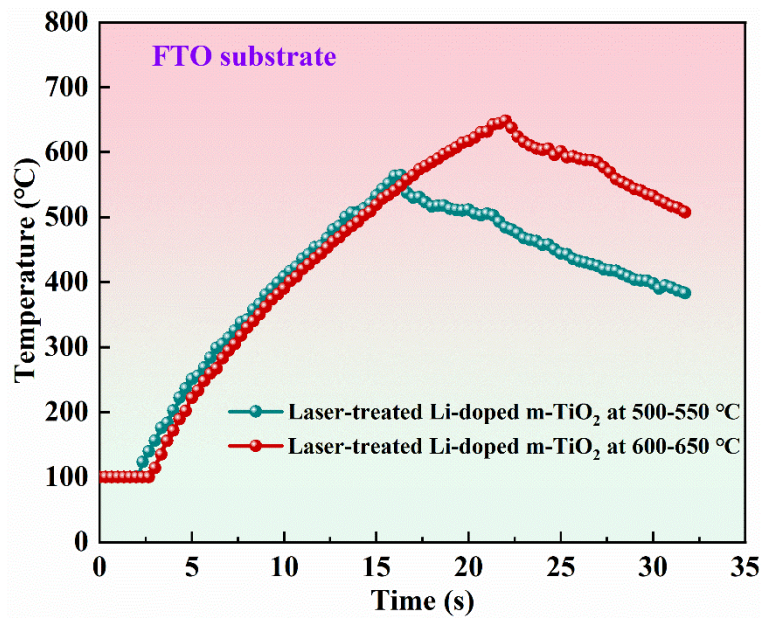

Figure S18 Temperature profiles of Li-doped m-TiO<sub>2</sub> films coated on FTO substrate during laser treatment with various laser parameters settings.

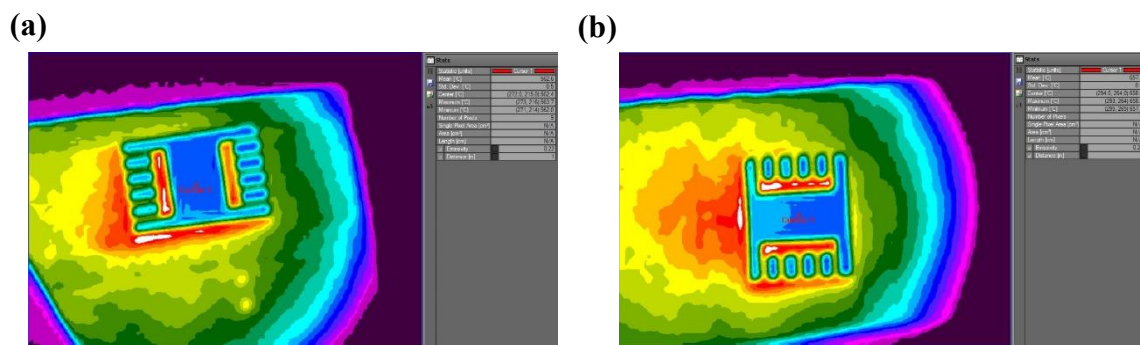

Figure S19 Thermal profiles of the laser-treated Li-doped m-TiO<sub>2</sub> on the FTO glass with peak treatment temperatures of (a) 500-550 and (b) 600-650 °C.

Table S1 Summary of photovoltaic parameters for the mesoporous PSCs with the furnace-treated undoped m-TiO<sub>2</sub> and Li-doped m-TiO<sub>2</sub> films.

| Samples                                             | $V_{OC}$ (V) | $J_{SC}$ (mA·cm <sup>-2</sup> ) | FF (%)     | Average PCE (%) | Champion PCE (%) |
|-----------------------------------------------------|--------------|---------------------------------|------------|-----------------|------------------|
| Undoped m-TiO <sub>2</sub>                          | 1.010±0.011  | 23.22±0.16                      | 73.19±0.64 | 17.16±0.19      | 17.71            |
| 0.5 mg mL <sup>-1</sup> Li-doped m-TiO <sub>2</sub> | 1.014±0.014  | 23.29±0.24                      | 73.63±0.72 | 17.38±0.29      | 17.86            |
| 1.0 mg mL <sup>-1</sup> Li-doped m-TiO <sub>2</sub> | 1.027±0.008  | 23.34±0.15                      | 74.03±1.33 | 17.74±0.31      | 18.10            |
| 1.5 mg mL <sup>-1</sup> Li-doped m-TiO <sub>2</sub> | 1.021±0.011  | 23.34±0.15                      | 73.95±0.98 | 17.63±0.35      | 18.04            |

Table S2 Laser processing parameters for the fabrication of Li-doped TiO<sub>2</sub> films.

|                                  | Temperatures (Measured by thermal cameral) | Spot area (cm <sup>2</sup> ) | Ramp power density (W·cm <sup>-2</sup> ) | Duration (s) | Soak power density (W·cm <sup>-2</sup> ) | Duration (s) |
|----------------------------------|--------------------------------------------|------------------------------|------------------------------------------|--------------|------------------------------------------|--------------|
| Li-doped m-TiO <sub>2</sub> /ITO | Laser-treated at 700-750 °C                | 196                          | 113                                      | 14           | 36                                       | 3            |
|                                  | Laser-treated at 800-850 °C                |                              | 113                                      | 18           | 36                                       | 3            |
|                                  | Laser-treated at 900-950 °C                |                              | 113                                      | 22           | 36                                       | 3            |
| Li-doped m-TiO <sub>2</sub> /FTO | Laser-treated at 500-550 °C                | 196                          | 113                                      | 14           | 36                                       | 3            |
|                                  | Laser-treated at 600-650 °C                |                              | 113                                      | 18           | 36                                       | 3            |

Table S3 Summary of XRD peak position, peak intensity, FWHM, and crystalline size calculated using Scherrer equation for the furnace-treated undoped m-TiO<sub>2</sub> and furnace- and laser-treated Li-doped m-TiO<sub>2</sub> films.

| Conditions                                                        | Peak position<br>2θ (°) | FWHM<br>(°) | Peak<br>intensity | Crystal<br>size (nm) |
|-------------------------------------------------------------------|-------------------------|-------------|-------------------|----------------------|
| <b>Furnace-treated undoped<br/>m-TiO<sub>2</sub> at 500 °C</b>    | 25.3                    | 0.638       | 669               | 12.76                |
| <b>Furnace-treated Li-doped<br/>m-TiO<sub>2</sub> at 500 °C</b>   | 25.3                    | 0.653       | 527               | 12.47                |
| <b>Laser-treated Li-doped m-TiO<sub>2</sub><br/>at 700-750 °C</b> | 25.3                    | 0.726       | 517               | 11.21                |
| <b>Laser-treated Li-doped m-TiO<sub>2</sub><br/>at 800-850 °C</b> | 25.3                    | 0.628       | 708               | 12.96                |
| <b>Laser-treated Li-doped m-TiO<sub>2</sub><br/>at 900-950 °C</b> | 25.3                    | 0.617       | 784               | 13.20                |

Table S4 The Calculated details for the energy level of furnace-treated undoped m-TiO<sub>2</sub>, Li-doped m-TiO<sub>2</sub> at 500°C and laser-treated Li-doped TiO<sub>2</sub> at 800-850 °C

| Conditions                                                             | $E_f$ (eV) | $E_{onset}$ (eV) | $E_g$ (eV) | $E_v$ (eV) | $E_c$ (eV) |
|------------------------------------------------------------------------|------------|------------------|------------|------------|------------|
| <b>Furnace-treated<br/>undoped m-TiO<sub>2</sub><br/>at 500 °C</b>     | -4.37      | 3.04             | 3.37       | -7.41      | -4.04      |
| <b>Furnace-treated<br/>Li-doped m-TiO<sub>2</sub><br/>at 500 °C</b>    | -4.41      | 3.06             | 3.38       | -7.47      | -4.09      |
| <b>Laser-treated Li-<br/>doped m-TiO<sub>2</sub> at<br/>800-850 °C</b> | -4.39      | 3.09             | 3.40       | -7.48      | -4.08      |

Table S5 The ratio of shoulder peak area to main peak area of O 1s peak with furnace-treated undoped m-TiO<sub>2</sub>, Li-doped m-TiO<sub>2</sub> and laser-treated Li-doped m-TiO<sub>2</sub>.

| Conditions                                  | Ratio (Shoulder Peak Area/ Main Peak Area) |
|---------------------------------------------|--------------------------------------------|
| Furnace-treated undoped m-TiO <sub>2</sub>  | 0.26                                       |
| Furnace-treated Li-doped m-TiO <sub>2</sub> | 0.34                                       |
| Laser-treated Li-doped m-TiO <sub>2</sub>   | 0.29                                       |

Table S6 Calculated parameters and trap density ( $N_t$ ) for furnace-treated undoped m-TiO<sub>2</sub>, Li-doped m-TiO<sub>2</sub> and laser-treated Li-doped m-TiO<sub>2</sub>.

| Samples                                     | L (nm) | $\epsilon_r$ | $V_{TFL}$ (V) | $N_t$ (cm <sup>-3</sup> ) |
|---------------------------------------------|--------|--------------|---------------|---------------------------|
| Furnace-treated undoped m-TiO <sub>2</sub>  | 150    | 55           | 0.70          | 1.89*10 <sup>17</sup>     |
| Furnace-treated Li-doped m-TiO <sub>2</sub> | 150    | 55           | 0.65          | 1.76*10 <sup>17</sup>     |
| Laser-treated Li-doped m-TiO <sub>2</sub>   | 150    | 55           | 0.58          | 1.57*10 <sup>17</sup>     |



Table S7 TRPL parameters for the perovskite films deposited on the different ETLs.

| Conditions                                                    | $\tau_1$ (ns) | $A_1$ (%) | $\tau_2$ (ns) | $A_2$ (%) | $\tau_{avg}$ (ns) |
|---------------------------------------------------------------|---------------|-----------|---------------|-----------|-------------------|
| <b>Furnace-treated undoped TiO<sub>2</sub> at 500 °C</b>      | 51.34         | 18.71     | 247.91        | 81.29     | 238.97            |
| <b>Furnace-treated Li-doped m-TiO<sub>2</sub> at 500 °C</b>   | 50.42         | 14.27     | 174.23        | 85.73     | 168.54            |
| <b>Laser-treated Li-doped m-TiO<sub>2</sub> at 800-850 °C</b> | 31.79         | 18.75     | 168.29        | 81.25     | 162.59            |

Table S8 Resistance of the ITO electrodes (covered by m-TiO<sub>2</sub>) annealed with furnace and laser treatments.

| Conditions                         | Resistance( $\Omega$ ) |
|------------------------------------|------------------------|
| <b>Before Laser treatment</b>      | 151.42 $\pm$ 15.36     |
| <b>Furnace-treated at 500 °C</b>   | 721.78 $\pm$ 11.29     |
| <b>Laser-treated at 700-750 °C</b> | 410.25 $\pm$ 13.65     |
| <b>Laser-treated at 800-850 °C</b> | 435.63 $\pm$ 16.41     |
| <b>Laser-treated at 900-950 °C</b> | 491.88 $\pm$ 17.52     |

Table S9 EIS fitting parameters for the devices with furnace-treated undoped TiO<sub>2</sub>, Li-doped m-TiO<sub>2</sub> at 500°C and laser treated Li-doped m-TiO<sub>2</sub> (800-850 °C).

| Conditions                                                    | $R_s$ ( $\Omega$ ) | $R_{rec}$ ( $\Omega$ ) | $CPE$ (F) |
|---------------------------------------------------------------|--------------------|------------------------|-----------|
| <b>Furnace-treated undoped TiO<sub>2</sub> at 500 °C</b>      | 47.6               | 1383.0                 | 2.5e-8    |
| <b>Furnace-treated Li-doped m-TiO<sub>2</sub> at 500 °C</b>   | 44.8               | 1542.0                 | 3.2e-8    |
| <b>Laser-treated Li-doped m-TiO<sub>2</sub> at 800-850 °C</b> | 40.4               | 3477.0                 | 2.8e-8    |

Table S10 Summary of photovoltaic parameters for the Cs<sub>0.1</sub>FA<sub>0.9</sub>PbI<sub>3</sub> devices with the furnace- and laser-treated Li-doped m-TiO<sub>2</sub> films.

| Conditions                         | $V_{OC}$ (V) | $J_{SC}$ (mA·cm <sup>-2</sup> ) | FF (%)     | Average PCE (%) | Champion PCE (%) |
|------------------------------------|--------------|---------------------------------|------------|-----------------|------------------|
| <b>Furnace-treated at 500 °C</b>   | 1.027±0.008  | 23.34±0.15                      | 74.03±1.33 | 17.74±0.31      | 18.10            |
| <b>Laser-treated at 700-750 °C</b> | 1.023±0.006  | 23.28±0.13                      | 74.01±1.14 | 17.62±0.30      | 18.03            |
| <b>Laser-treated at 800-850 °C</b> | 1.038±0.014  | 23.42±0.18                      | 76.08±1.83 | 18.48±0.40      | 19.15            |
| <b>Laser-treated at 900-950 °C</b> | 1.027±0.008  | 23.40±0.18                      | 74.91±1.47 | 18.00±0.40      | 19.05            |

Table S11 Comparison of laser processing and conditional furnace processing.

| Doping process                           | Processing temperature | Fabrication Conditions | Processing time (TiO <sub>2</sub> + doping process) | Performance of PSCs |
|------------------------------------------|------------------------|------------------------|-----------------------------------------------------|---------------------|
| <b>Laser process (Li)</b>                | 700-900°C              | Ambient<br>(this work) | 21s + 21s                                           | 19.15%              |
| <b>Furnace process (Li)</b>              | 450-500°C              | Ambient<br>(this work) | 1.5h + 1.5h                                         | 18.10%              |
| <b>Flame annealing (Co)<sup>16</sup></b> | 1000°C                 | Glove box              | 0.5h + 40s                                          | 19.6%               |
| <b>Furnace process (Li)<sup>17</sup></b> | 450-500°C              | Glove box              | 1.5h + 1.5h                                         | 17.59%              |
| <b>Furnace process (Nb)<sup>18</sup></b> | 500°C                  | Glove box              | 0.5h + 1.5h                                         | 13.4%               |
| <b>Hot plate (Nd)<sup>19</sup></b>       | 450-600°C              | Glove box              | 0.75h + 3h                                          | 18.1%               |
| <b>Furnace process (Zn)<sup>20</sup></b> | 450-500°C              | Glove box              | Unmentioned + 0.5h                                  | 18.3%               |

Table S12 The hysteresis index for the PSCs with the furnace-treated undoped m-TiO<sub>2</sub>, furnace- and laser-treated Li-doped m-TiO<sub>2</sub>.

| Conditions                                                    | HI         |
|---------------------------------------------------------------|------------|
| <b>Furnace-treated undoped m-TiO<sub>2</sub> at 500 °C</b>    | 0.38± 0.02 |
| <b>Furnace-treated Li-doped m-TiO<sub>2</sub> at 500 °C</b>   | 0.31± 0.01 |
| <b>Laser-treated Li-doped m-TiO<sub>2</sub> at 700-750 °C</b> | 0.35± 0.02 |
| <b>Laser-treated Li-doped m-TiO<sub>2</sub> at 800-850 °C</b> | 0.28± 0.02 |
| <b>Laser-treated Li-doped m-TiO<sub>2</sub> at 900-950 °C</b> | 0.30± 0.01 |

## Reference

- 1 J. Jeong, M. Kim, J. Seo, H. Lu, P. Ahlawat, A. Mishra, Y. Yang, M. A. Hope, F. T. Eickemeyer, M. Kim, Y. J. Yoon, I. W. Choi, B. P. Darwich, S. J. Choi, Y. Jo, J. H. Lee, B. Walker, S. M. Zakeeruddin, L. Emsley, U. Rothlisberger, A. Hagfeldt, D. S. Kim, M. Grätzel and J. Y. Kim, *Nature*, 2021, **592**, 381–385.
- 2 T. Zhong, L. Shi, H. Hao, J. Dong, K. Tang, X. Xu, S. L. Hamukwaya, H. Liu and J. Xing, *ACS Sustain. Chem. Eng.*, 2021, **9**, 13010–13020.
- 3 M. Wang, H. Sun, L. Meng, M. Wang and L. Li, *Adv. Mater.*, 2022, 2200041.
- 4 D. Wang, Q. Chen, H. Mo, J. Jacobs, A. Thomas and Z. Liu, *Mater. Adv.*, 2020, **1**, 2057–2067.
- 5 X. Xu, C. Ma, Y. M. Xie, Y. Cheng, Y. Tian, M. Li, Y. Ma, C. S. Lee and S. W. Tsang, *J. Mater. Chem. A*, 2018, **6**, 7731–7740.
- 6 U. D. Menda, G. Ribeiro, D. Nunes, T. Calmeiro, H. Águas, E. Fortunato, R. Martins and M. J. Mendes, *Mater. Adv.*, 2021, **2**, 6344–6355.
- 7 J. Troughton, K. Hooper and T. M. Watson, *Nano Energy*, 2017, **39**, 60–68.
- 8 W. Zhang, Y. Li, X. Liu, D. Tang, X. Li and X. Yuan, *Chem. Eng. J.*, 2020, **379**, 122298.
- 9 K. Huang, H. Li, C. Zhang, Y. Gao, T. Liu, J. Zhang, Y. Gao, Y. Peng, L. Ding and J. Yang, *Sol. RRL*, , DOI:10.1002/solr.201800318.
- 10 K. Jung, K. Oh, D. H. Kim, J. W. Choi, K. C. Kim and M. J. Lee, *Nano Energy*, 2021, **89**, 106387.
- 11 J. H. Lee, K. Jung and M. J. Lee, *J. Alloys Compd.*, 2021, **879**, 160373.
- 12 J. Zhao, G. He, D. Yang, D. Guo, L. Yang, J. Chen and D. Ma, *Sustain. Energy Fuels*, 2021, **5**, 4268–4276.
- 13 R. Xia, X. X. Gao, Y. Zhang, N. Drigo, V. I. E. Queloz, F. F. Tirani, R. Scopelliti, Z.

- Huang, X. Fang, S. Kinge, Z. Fei, C. Roldán-Carmona, M. K. Nazeeruddin and P. J. Dyson, *Adv. Mater.*, , DOI:10.1002/adma.202003801.
- 14 Z. Wang, J. Jin, Y. Zheng, X. Zhang, Z. Zhu, Y. Zhou, X. Cui, J. Li, M. Shang, X. Zhao, S. Liu and Q. Tai, *Adv. Energy Mater.*, 2021, **11**, 1–8.
- 15 W. T. Wang, J. Sharma, J. W. Chen, C. H. Kao, S. Y. Chen, C. H. Chen, Y. C. Feng and Y. Tai, *Nano Energy*, 2018, **49**, 109–116.
- 16 J. K. Kim, S. U. Chai, Y. Ji, B. Levy-Wendt, S. H. Kim, Y. Yi, T. F. Heinz, J. K. Nørskov, J. H. Park and X. Zheng, *Adv. Energy Mater.*, 2018, **8**, 1–7.
- 17 A. Peter Amalathas, L. Landová, B. Conrad and J. Holovsky, *J. Phys. Chem. C*, 2019, **123**, 19376–19384.
- 18 D. H. Kim, G. S. Han, W. M. Seong, J. W. Lee, B. J. Kim, N. G. Park, K. S. Hong, S. Lee and H. S. Jung, *ChemSusChem*, 2015, **8**, 2392–2398.
- 19 B. Roose, K. C. Gödel, S. Pathak, A. Sadhanala, J. P. C. Baena, B. D. Wilts, H. J. Snaith, U. Wiesner, M. Grätzel, U. Steiner and A. Abate, *Adv. Energy Mater.*, 2016, **6**, 1–7.
- 20 M. C. Wu, S. H. Chan, K. M. Lee, S. H. Chen, M. H. Jao, Y. F. Chen and W. F. Su, *J. Mater. Chem. A*, 2018, **6**, 16920–16931.
